# Supplementary material for: Structural Characteristics and Evolution Mechanism of Paleogene Faults in the Central Dongying Depression, Bohai Bay Basin
Source: Research Square preprint supplement (doi:10.21203/rs.3.rs-3895633/v1), 2024-02-01
Supplement: Supplementary file 1 [file c3a2930f9be5b1e3c3054793.docx]

**Table 1 The main fracture profile morphology of the central block of Dongying depression**

| Fault grade | Fracture name | Trend | Profile morphology |
| --- | --- | --- | --- |
| Second-order fault | Shicun fault | NWW | South-dipping attitude |
| Tertiary fracture | He 125 fault | NE | North-west tilt attitude |
| He 4 fault | EW | North-dipping attitude |
| He 4-1 fault | SE-NE | North-dipping attitude |
| He 3 fault | NNE | North-west tilt attitude |
| Niuzhuangbei fault | EW | North-dipping attitude |
| Wang 1 fault | EW | North-dipping attitude |
| Tong 4 fault | NEE | North-dipping attitude |
| Guan 136 fault | EW | North-dipping attitude |

**Table 2 The growth index table of main faults in the study area**

| Fracture name | period | | | | | | | |
| --- | --- | --- | --- | --- | --- | --- | --- | --- |
| Eds | Edx | Es1-Es2s | Es2x-Es3s | Es3z | Es3x | Es4 | Ek |
| Guan 136 fault | 1.00 | 1.34 | 1.08 | 1.01 | 1.48 | 1.20 | 1.14 | 1.46 |
| 1.04 | 1.04 | 1.00 | 1.14 | 1.12 | 1.00 | 1.28 | 1.14 |
| Tong 4 fault | 1.03 | 1.29 | 1.07 | 1.00 | 1.42 | 1.06 | 1.00 | 1.00 |
| 1.03 | 1.25 | 1.05 | 1.24 | 1.38 | 1.21 | 1.00 | 1.35 |
| 1.00 | 1.19 | 1.05 | 1.01 | 1.27 | 1.04 | 1.02 | 1.02 |
| Wang 1 fault | 1.18 | 1.27 | 1.03 | 1.10 | 1.34 | 1.04 | 1.01 | 1.01 |
| Niuzhuangbei fault | 1.03 | 1.23 | 1.00 | 1.14 | 1.29 | 1.03 | 1.12 | 1.41 |
| 1.01 | 1.09 | 1.02 | 1.10 | 1.26 | 1.06 | — | — |
| 1.03 | 1.04 | 1.00 | 1.13 | 1.31 | 1.09 | — | — |
| He 125 fault | 1.04 | 1.12 | 1.00 | 1.00 | 1.65 | 1.24 | 1.17 | 1.06 |
| 1.02 | 1.03 | 1.01 | 1.10 | 1.48 | 1.16 | 1.02 | 1.08 |
| 1.00 | 1.02 | 1.07 | 1.05 | 1.23 | 1.15 | — | — |
| 1.00 | 1.02 | 1.01 | 1.01 | 1.17 | 1.05 | 1.02 | — |
| 1.05 | 1.05 | 1.00 | 1.01 | 1.98 | 1.00 | 1.01 | — |
| 1.23 | 1.00 | 1.04 | 1.06 | 1.10 | 1.05 | — | — |
| He 3 fault | 1.02 | 1.19 | 1.02 | 1.00 | 1.00 | 1.08 | 1.05 | — |
| He 4 fault | 1.07 | 1.07 | 1.00 | 1.00 | 1.06 | 1.00 | — | — |
| He 4-1 fault | 1.02 | 1.33 | 1.13 | 1.00 | 1.22 | 1.03 | — | — |
| 1.01 | 1.23 | 1.00 | 1.00 | 1.40 | 1.21 | — | — |
| Shicun fault | — | — | 1.42 | 2.14 | 2.29 | 1.82 | 1.24 | 2.95 |
| 1.28 | 1.00 | 1.11 | 1.14 | 2.05 | 2.26 | 2.56 | 3.60 |

**Table 3 The statistical table of main fault activity rate in the study area**

| Fault active rate（m/Ma） | Period | | | | |
| --- | --- | --- | --- | --- | --- |
| Ed | Es1-Es2s | Es2x-Es3 | Es4 | Ek |
| Guan 136 fault | 2.57 | 1.76 | 7.06 | 2.39 | 6.62 |
| Tong 4 fault | 3.57 | 3.78 | 11.04 | 0.00 | 0.11 |
| Niuzhuangbei fault | 3.91 | 0.00 | 24.11 | 6.62 | 22.94 |
| Wang 1 fault | 5.56 | 1.04 | 16.71 | 0.36 | 0.38 |
| Shicun fault | 1.83 | 3.49 | 27.96 | 40.83 | 29.95 |
| Branch of He 125 fault | 4.23 | 0.00 | 20.29 | 5.09 | 1.65 |
| Branch of He 125 fault | 1.98 | 0.00 | 35.75 | 0.83 | — |
| Branch of He 125 fault | 0.37 | 0.28 | 11.29 | 1.62 | — |
| He 3 fault | 3.81 | 1.23 | 2.87 | 2.20 | — |
| He 4 fault | 1.17 | 0.00 | 4.82 | — | — |
| He 4-1 fault | 7.73 | 0.00 | 28.70 | — | — |

**Table 4 The statistical table of fault displacement of main third-order faults in different periods**

| Fault displacement（m） | **Period** | | | | | | | | |
| --- | --- | --- | --- | --- | --- | --- | --- | --- | --- |
| Ng | Eds | Edx | Es1-Es2s | Es2x-Es3s | Es3z | Es3x | Es4 | Ek |
| He 125 fault | 20.12 | 18.71 | 21.73 | 22.89 | 25.60 | 78.17 | 85.01 | 97.98 | — |
| Niuzhuangbei fault | 28.22 | 34.46 | 42.76 | 43.41 | 79.37 | 181.68 | 193.10 | — | — |
| Tong 4 fault | 57.24 | 57.24 | 86.11 | 91.19 | 92.70 | 139.03 | 144.86 | 151.40 | 172.63 |
| Wang 1 fault | 67.49 | 97.40 | 113.09 | 117.47 | 133.88 | 202.83 | 209.40 | 212.31 | 217.79 |

**Table 5 The extension amount and extension rate of the main north-south survey lines in each period**

| survey line | Inline3030 | | Inline3430 | | Inline3830 | |
| --- | --- | --- | --- | --- | --- | --- |
| Extension amount（km） | Rate of extension (%) | Extension amount（km） | Rate of extension (%) | Extension amount（km） | Rate of extension (%) |
| T1 | 0.30 | 0.73 | 0.27 | 0.77 | 0.21 | 0.79 |
| T2 | 0.63 | 1.53 | 0.54 | 1.56 | 0.83 | 3.20 |
| T4 | 0.25 | 0.62 | 0.21 | 0.60 | 0.23 | 0.90 |
| T6’ | 1.11 | 2.80 | 1.24 | 3.76 | 1.12 | 4.56 |
| T7’ | — | — | 0.54 | 1.66 | 0.56 | 2.33 |
